# Supplementary material
Source: PubMed Central journal article supplement (PMC3060591)

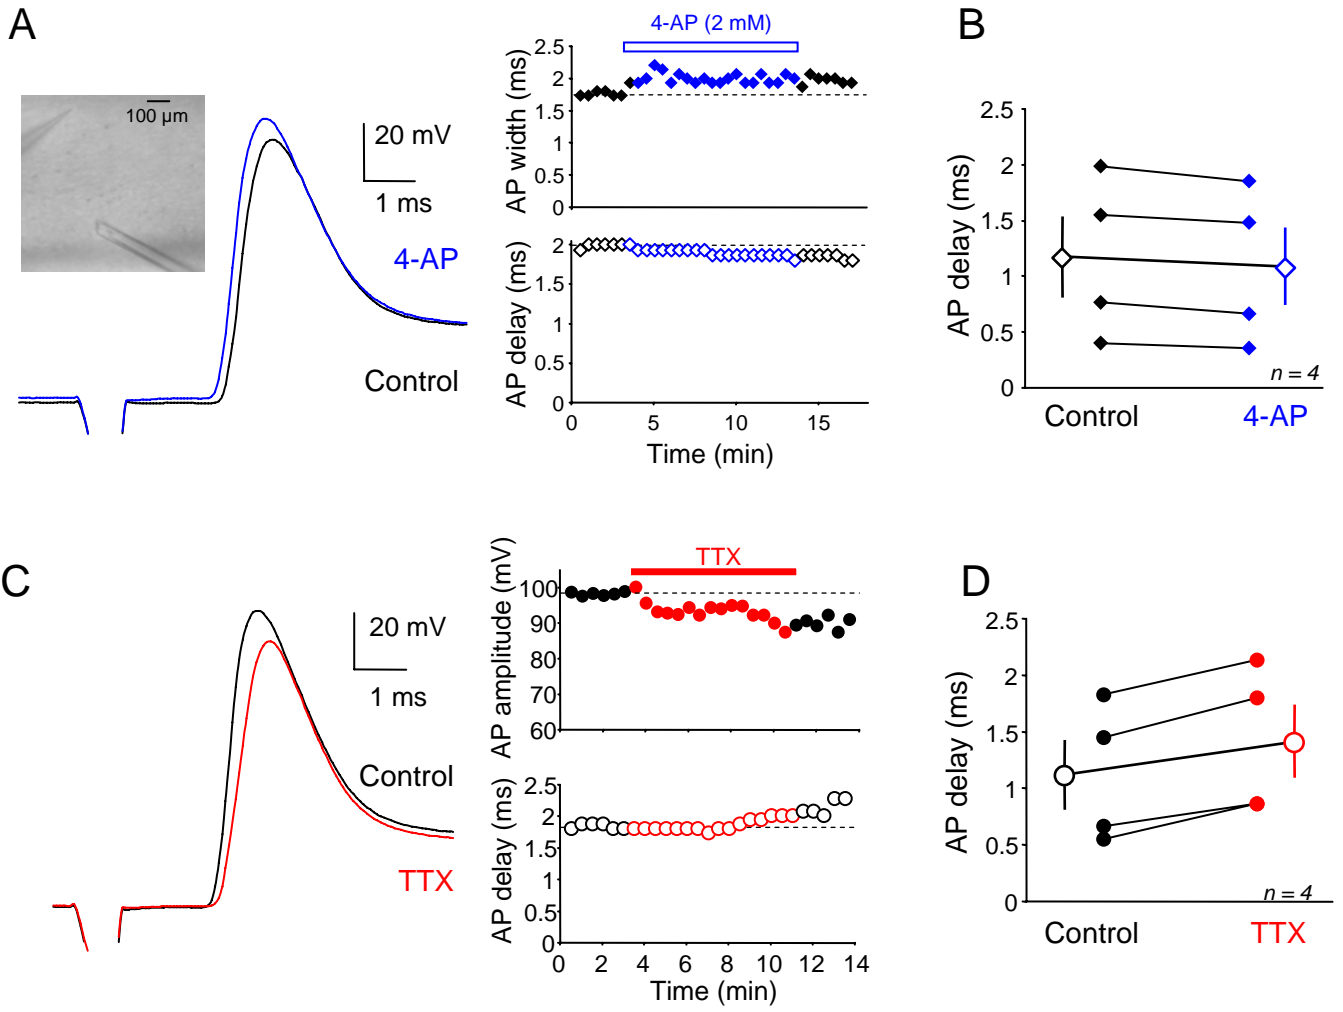

Figure S1

Supplement: tjp0589-1117-SD1.pdf [file tjp0589-1117-SD1.pdf]
